# Supplementary material
Source: MDPI journal article supplement (https://www.mdpi.com/2073-4433/12/9/1200)
Supplement: s1 [file s1 › atmosphere-1361927-supplementary.pdf]

**Table S1.** Pakistan's agriculture sector's responsibility for environmental impact, under direct environmental impact versus total environmental impact based on sectoral consumption.

| Item <sup>1</sup>                | Total direct environmental impact | Total environmental impact based on inter plus intra-sectoral consumption | Percentage change in environmental impact responsibility (%) <sup>2</sup> |
|----------------------------------|-----------------------------------|---------------------------------------------------------------------------|---------------------------------------------------------------------------|
| <b>Land (1000 ha)</b>            | <b>43,640</b>                     | <b>18,791</b>                                                             | <b>-57 %</b>                                                              |
| <b>Water (Mm<sup>3</sup>/yr)</b> | <b>96,779</b>                     | <b>36,631</b>                                                             | <b>-62 %</b>                                                              |
| Blue water (Mm <sup>3</sup> /yr) | 74,942                            | 28,360                                                                    | -62 %                                                                     |
| Grey water (Mm <sup>3</sup> /yr) | 21,837                            | 8,271                                                                     | -62 %                                                                     |
| <b>Nitrogen impact (Gg N)</b>    | <b>3,131</b>                      | <b>1,186</b>                                                              | <b>-62 %</b>                                                              |
| N <sub>2</sub> O (Gg N)          | 106                               | 40                                                                        | -62 %                                                                     |
| NH <sub>3</sub> (Gg N)           | 1,012                             | 383                                                                       | -62 %                                                                     |
| NO <sub>x</sub> (Gg N)           | 43                                | 18                                                                        | -59 %                                                                     |
| N (Gg N)                         | 1,970                             | 746                                                                       | -62 %                                                                     |
| <b>CO<sub>2</sub> (Gg)</b>       | <b>2,428</b>                      | <b>1,547</b>                                                              | <b>-36 %</b>                                                              |

<sup>1</sup> ha= hectare, Mm<sup>3</sup>= cubic millimeter, Gg= gigagrams, yr= year. <sup>2</sup> The change in responsibility is estimated in comparison to the conventional direct environmental responsibility. As can be seen, under our proposed method of considering the sectoral consumption-induced direct and indirect environmental impacts, Pakistan's agriculture sector environmental impact responsibility is reduced considerably. Which implies the diversification of environmental impact responsibility to the downstream importers of agricultural products.

**Table S2.** Pakistan's agriculture sector's direct environmental impacts and sectoral linkages.

| Item <sup>1</sup>                | Downstream environmental linkage | Internal environmental linkage | Total direct environmental impact | Pakistan's total sectoral environmental impact <sup>1</sup> |
|----------------------------------|----------------------------------|--------------------------------|-----------------------------------|-------------------------------------------------------------|
| Land (1000 ha)                   | 27,267                           | 16,373                         | 43,640                            | 163,236                                                     |
| Water (Mm <sup>3</sup> /yr)      | 60,469                           | 36,310                         | 96,779                            | 103,724                                                     |
| Blue water (Mm <sup>3</sup> /yr) | 46,825                           | 28,117                         | 74,942                            | 75,679                                                      |
| Grey water (Mm <sup>3</sup> /yr) | 13,644                           | 8,193                          | 21,837                            | 28,045                                                      |
| Nitrogen impact (Gg N)           | 1,956                            | 1,175                          | 3,131                             | 3,415                                                       |
| N <sub>2</sub> O (Gg N)          | 66                               | 40                             | 106                               | 117                                                         |
| NH <sub>3</sub> (Gg N)           | 632                              | 380                            | 1,012                             | 1,022                                                       |
| NO <sub>x</sub> (Gg N)           | 27                               | 16                             | 43                                | 293                                                         |
| N (Gg N)                         | 1,231                            | 739                            | 1,970                             | 1,982                                                       |
| CO <sub>2</sub> (Gg)             | 1,517                            | 911                            | 2,428                             | 168,180                                                     |

<sup>1</sup> Pakistan's total sectoral environmental impact is estimated as the sum of all sector environmental impacts from the 2015 input-output table available at: <https://worldmrio.com/>.

**Table S3.** Pakistan's agriculture sector's indirect environmental impacts and sectoral linkages.

| Item                             | Upstream environmental linkage | Mixed environmental linkage | Total indirect environmental impact | Pakistan's total sectoral environmental impact |
|----------------------------------|--------------------------------|-----------------------------|-------------------------------------|------------------------------------------------|
| Land (1000 ha)                   | 398                            | 2020                        | 2418                                | 163,236                                        |
| Water (Mm <sup>3</sup> /yr)      | 8                              | 313                         | 321                                 | 103,724                                        |
| Blue water (Mm <sup>3</sup> /yr) | 0.4                            | 243                         | 243                                 | 75,679                                         |
| Grey water (Mm <sup>3</sup> /yr) | 7.6                            | 71                          | 78                                  | 28,045                                         |
| Nitrogen impact (Gg N)           | 1.5                            | 10                          | 12                                  | 3,415                                          |
| N <sub>2</sub> O (Gg N)          | 0.03                           | 0.3                         | 0.33                                | 117                                            |
| NH <sub>3</sub> (Gg N)           | 0                              | 3.3                         | 3.3                                 | 1,022                                          |

|                      |      |     |      |         |
|----------------------|------|-----|------|---------|
| NOx (Gg N)           | 1.4  | 0.1 | 1.5  | 293     |
| N (Gg N)             | 0.04 | 6.4 | 6.44 | 1,982   |
| CO <sub>2</sub> (Gg) | 628  | 7.9 | 636  | 168,180 |

**Table S4.** A comparison between the Pakistani agriculture sector and Pakistan's total sectoral environmental impacts.

| Item                             | Total environmental impact (direct + indirect) | Pakistan's total sectoral environmental impact |
|----------------------------------|------------------------------------------------|------------------------------------------------|
| Land (1000 ha)                   | 46,058                                         | 163,236                                        |
| Water (Mm <sup>3</sup> /yr)      | 97,100                                         | 103,724                                        |
| Blue water (Mm <sup>3</sup> /yr) | 75,185                                         | 75,679                                         |
| Grey water (Mm <sup>3</sup> /yr) | 21,915                                         | 28,045                                         |
| Nitrogen impact (Gg N)           | 3,142                                          | 3,415                                          |
| N <sub>2</sub> O (Gg N)          | 106                                            | 117                                            |
| NH <sub>3</sub> (Gg N)           | 1,015                                          | 1,022                                          |
| NOx (Gg N)                       | 45                                             | 293                                            |
| N (Gg N)                         | 1,976                                          | 1,982                                          |
| CO <sub>2</sub> (Gg)             | 3,065                                          | 168,180                                        |
